# Supplementary material for: Overexpression of the poplar NF-YB7 transcription factor confers drought tolerance and improves water-use efficiency in Arabidopsis
Source: PubMed Central journal article supplement (PMC3808328; doi:10.1093/jxb/ert262), 2013-09-04
Supplement: supp_ert262_jexbot094508_file001.pdf [file supp_ert262_jexbot094508_file001.pdf]

*Journal of Experimental Botany*

**Overexpression of the poplar *NF-YB7* transcription factor confers drought tolerance and improves water-use efficiency in *Arabidopsis***

Xiao Han\*, Sha Tang\*, Yi An, Dong-Chao Zheng, Xin-Li Xia<sup>†</sup> and Wei-Lun Yin<sup>†</sup>

Table S1. Primer sequences used for cloning of *PdNF-YB7* cDNA, construction of *35S:PdNF-YB7*, PCR and qPCR of *PdNF-YB7* in poplar under PEG6000 and ABA treatment. *PdActin* was used as an internal control. Enzyme sites *Bgl*III and *Spe*I were used for construction of the expression vector.

| Primer name                             | Primer sequence                 |
|-----------------------------------------|---------------------------------|
| For cloning of <i>PdNF-YB7</i> cDNA     |                                 |
| PdNFYB7f                                | ATGACAGGAAAAAGGACCCAGATC        |
| PdNFYB7r                                | CCAGCCAACCCCGTGATGAA            |
| For construction of <i>35S:PdNF-YB7</i> |                                 |
| rePdNFYB7f                              | AGATCTGATGACAGGAAAAAGGACCCAGATC |
| rePdNFYB7r                              | ACTAGTCCAGCCAACCCCGTGA          |
| For PCR and qPCR                        |                                 |
| PdB7f                                   | AAAAGGACCCAGATCTGCCC            |
| PdB7r                                   | TGCATTTGCTGGGAGGGATT            |
| PdActinF                                | GTCCTCTTCCAGCCATCTC             |
| PdActinR                                | TTCGGTCAGCAATACCAGG             |

Table S2. Primers used in qPCR analysis for expression levels of drought-relative genes in *oxPdB7s*, Col-0, *nf-yb3* and *nf-yb3/PdB7* plants.

| Gene   | Locus ID  | Forward Primer           | Reverse Primer            |
|--------|-----------|--------------------------|---------------------------|
| RD29B  | AT5G52300 | ATACCTTCCGACCAGATAGCGG   | TACCACCGAGCCAAGAAGTGAC    |
| RAB18  | AT5G66400 | GCAACTCCACAAGGAAAGTGGT   | TGATGACCTGGCAACTTCTCC     |
| CBF4   | AT5G51990 | AAGCTGCAATGGCGTTTCAG     | ACACACCACCATTCTGCTCCTC    |
| COR15B | AT2G42530 | TCAGTGGCATGGGTTCTTCTTCCA | GAGGTCATCGAGGATGTTGCCGT   |
| KIN1   | AT5G15960 | GCAAAACGCGAGCTACCAA      | TGTCCAGTCTGTTGCAAGGAGT    |
| LEA76  | AT1G52690 | AGAACAAGGCACACGATGCAG    | AAGTGTGCTTCACCGCATCAG     |
| BAM5   | AT4G15210 | GGTTGGGTGTTTCCCGGCATCGGA | GGCTTCTCCTAAGATCTGATCTCCA |
| LTP    | AT2G37870 | CGTTGAGGCGGCAGGTGAGTGT   | TGTAACGTCCACATCGCTTGCCA   |
| GST    | AT1G17170 | CCTTCCCTCCGATCCTTACAAGA  | CAACCCAAGTTTCTTCTACGTTTCG |
| COR15A | AT2G42540 | GTTCTCACTGGTATGGCTTCTT   | GTCTTTCGCTTTCTCACCATCTGCT |
| 18S    | AT3G41768 | CGTCCCTGCCCTTTGTACAC     | CGAACACTTCACCGGATCATT     |

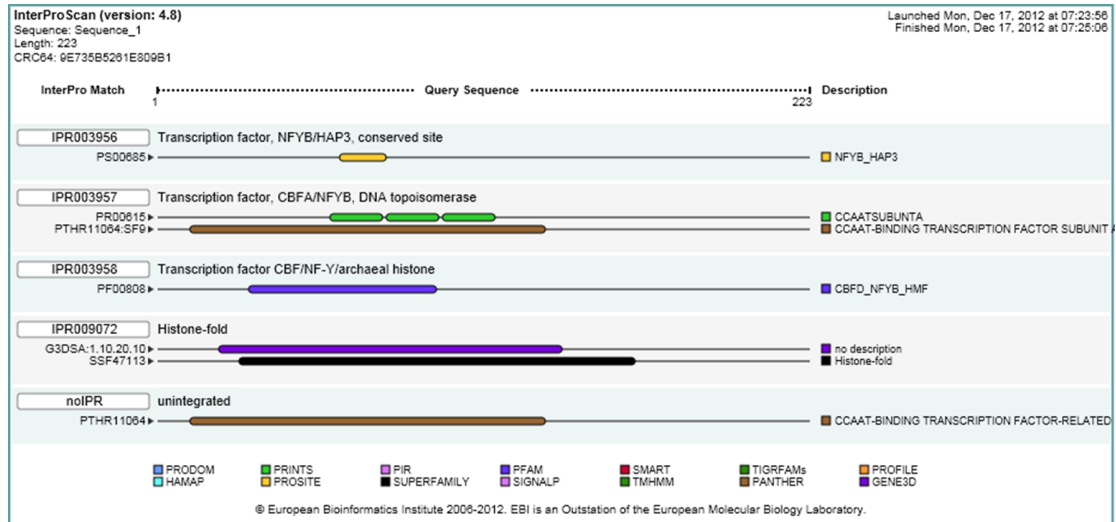

Fig. S1. The structure alignment result of PdNF-YB7 amino acid sequence. The protein structure alignment with InterPro (<http://www.ebi.ac.uk/interpro/>) showed the PdNF-YB7 sequence domain includes a NF-YB transcription factor conserved site (IPR003956), NF-YB binding site (IPR003957), and NF-YB archaeal histone (IPR003958).

Table S3. Putative elements of the promoter of *PdNF-YB7*. The PlantCARE database (<http://bioinformatics.psb.ugent.be/webtools/plantcare/html/>) was used for predicted analysis of the *PdNF-YB7* promoter.

| Element        | Core Sequence        | Number | Function                                  |
|----------------|----------------------|--------|-------------------------------------------|
| ABRELATERD1    | ACGTG                | 1      | Respond to dehydration and dark condition |
| ACGTATERD1     | ACGT                 | 4      | Respond to dehydration                    |
| ARR1AT         | NGATT                | 32     | Respond to CTK                            |
| CAATBOX1       | CAAT                 | 30     | Transcription enhancer                    |
| CACTFTPPCA1    | YACT                 | 33     | Regulation for ppcA1                      |
| CATATGGMSAUR   | CATATG               | 2      | Respond to auxin                          |
| CBFHV          | RYCGAC               | 1      | Respond to drought stress                 |
| CCAATBOX1      | CCAAT                | 6      | Regulation to flowering                   |
| CIACADIANLELHC | CAANNNNATC           | 5      | Regulation to circadian rhythm            |
| CPBCSPOR       | TATTAG               | 1      | Respond to CTK                            |
| CURECORECR     | GTAC                 | 10     | Respond to copper and oxygen              |
| DPBFCOREDCDC3  | ACACNNG              | 2      | Respond to ABA                            |
| ERELEE4        | AWTTCAAA             | 1      | Respond to ethylene                       |
| GAREAT         | TAACAAR              | 1      | Respond to GA                             |
| GATABOX        | GATA                 | 21     | Regulation to light                       |
| GT1CONSENSUS   | GRWAAW               | 34     | Regulation to light                       |
| GT1GMSCAM4     | GAAAAA               | 15     | Regulation to pathogen and salt           |
| MYB            | WAACCA/YAACKG/CNGTTR | 10     | Regulation to drought and ABA             |
| MYC            | CANNTG               | 20     | Regulation to drought, ABA and cold       |

|                |          |    |                                       |
|----------------|----------|----|---------------------------------------|
| NTBBF1ARROLB   | ACTTTA   | 2  | Respond to auxin                      |
| P1BS           | GNATATNC | 2  | Respond to phosphate                  |
| POLLEN1LELAT52 | AGAAA    | 23 | Regulation to development of pollen   |
| TAAAGSTKST1    | TAAAG    | 9  | Regulation to development of stoma    |
| TBOXATGAPB     | ACTTTG   | 4  | Regulation to CO <sub>2</sub> fixture |
| WBOXATNPR1     | TTGAC    | 4  | Respond to SA                         |
| WBOXHVISO1     | TGACT    | 3  | Respond to sugar                      |

---
